# 1 **Low-cost generation of clinical-grade layperson-friendly** 2 **pharmacogenetic passports using oligonucleotide arrays**

## 4 **Authors and affiliations**

5 Pauline Lanting<sup>1,2,3\*</sup>, Robert Warmerdam<sup>1,3\*</sup>, Jelle Slager<sup>1</sup>, Harm Brugge<sup>1</sup>, Taichi  
6 Ochi<sup>4</sup>, Marloes Benjamins<sup>1</sup>, Esteban Lopera-Maya<sup>1</sup>, Soesma Jankipersadsing<sup>1</sup>, Jody  
7 Gelderloos-Arends<sup>1</sup>, Daphne Teuben<sup>1</sup>, Dennis Hendriksen<sup>1,6</sup>, Bart Charbon<sup>1,6</sup>,  
8 Lennart Johansson<sup>1,6</sup>, Thijs Oude Munnink<sup>2</sup>, Nienke de Boer-Veger<sup>5</sup>, Lifelines NEXT,  
9 LifeLines Cohort Study, Bob Wilffert<sup>2,4 †</sup>, Morris Swertz<sup>1,6</sup>, Daan Touw<sup>2</sup>, Patrick  
10 Deelen<sup>1,3</sup>, Nine Knoers<sup>1</sup>, Jackie Dekens<sup>1,7#</sup>, Lude Franke<sup>1,3#</sup>

11  
12 \* Contributed equally

13 † Deceased

14 # To whom correspondence should be addressed

15

16 1. Department of Genetics, University Medical Center Groningen, University of

17 Groningen, Groningen, The Netherlands

18 2. Department of Clinical Pharmacy and Pharmacology, University Medical

19 Center Groningen, University of Groningen, Groningen, The Netherlands

20 3. Oncode Institute, Utrecht, The Netherlands

21 4. Groningen Research Institute of Pharmacy, Unit of PharmacoTherapy,

22 Epidemiology & Economics, University of Groningen, Groningen, The

23 Netherlands

24 5. Service Apotheek Boterdiep, Groningen, The Netherlands

25 6. Genomics Coordination Center, Groningen, The Netherlands

26 7. Center for Development and Innovation, University Medical Center

27 Groningen, University of Groningen, Groningen, The Netherlands

28 **NOTE: This preprint reports new research that has not been certified by peer review and should not be used to guide clinical practice.**

## 29 **Abstract**

30 Pharmacogenomic (PGx) information is essential for precision medicine, enabling  
31 drug prescriptions to be personalized according to an individual's genetic  
32 background. Almost all individuals will carry a genetic marker that affects their drug  
33 response, so the ideal drug prescription for these individuals will differ from the  
34 population-level guidelines. Currently, PGx information is often not available at first  
35 prescription, reducing its effectiveness. Pharmacogenetic information is most often  
36 obtained using special assays, making it expensive and time-consuming to generate.  
37 We therefore hypothesized that we could also use genome-wide oligonucleotide  
38 genotyping arrays to generate comprehensive PGx information (PGx passports),  
39 thereby decreasing the cost and time required for PGx testing, and lowering the  
40 barrier to generating PGx information prior to first prescription.

41

42 Taking advantage of existing genetic data generated in two biobanks, we developed  
43 and validated Asterix, a low-cost clinical-grade PGx passport pipeline for 12 PGx  
44 genes. In these biobanks we performed and clinically validated genetic variant  
45 calling and statistical phasing and imputation. In addition, we developed and  
46 validated a novel *CYP2D6* copy number variant calling tool, foregoing the need to  
47 use separate PCR-based copy number detection. Ultimately, we returned 1227 PGx  
48 passports to biobank participants via a layperson-friendly app, improving knowledge  
49 of PGx among citizens. Our study demonstrates the feasibility of a low-cost clinical-  
50 grade PGx passport pipeline that could be readily implemented in clinical settings to  
51 enhance personalized healthcare, ensuring that patients receive the most effective  
52 and safe drug therapy based on their unique genetic makeup.

53

## 54 **Keywords**

55 Pharmacogenetics, pharmacogenomics, PGx profile, PGx passport, clinical  
56 pharmacogenomics

57

## 58 **1. Introduction**

59 There is now extensive knowledge available on pharmacogenes, and clinical  
60 guidelines are available for personalized drug treatment using genetic data (1).  
61 However, the application of pharmacogenetics (PGx) in clinical practice remains  
62 limited (2) and is mostly done reactively to understand why patients reacted poorly to  
63 prescribed drugs. However, a pre-emptive pharmacogenetic passport would allow  
64 results to be stored in (electronic) medical files for future medical use (3), ensuring  
65 that PGx data are available at first prescription, thereby enabling optimized treatment  
66 and preventing adverse effects (4,5). Currently, the major impediments to such pre-  
67 emptive testing are cost and speed: PGx information is most commonly obtained  
68 using dedicated assays that target a limited subset of haplotypes of a single gene.  
69 This makes the generation of a complete, multi-gene profile time-consuming and  
70 costly.

71

72 In theory, PGx data can also be obtained from genetic data that is routinely used in  
73 both research and clinical genetics. Single nucleotide polymorphism (SNP)  
74 microarrays in particular have proven essential for detection of Copy Number  
75 Variations (CNVs) in clinical genetics and genome-wide association studies (GWAS)  
76 in research (6,7). However, whether this data can be used to provide a clinical-grade  
77 PGx passport to individuals is largely unknown, and there are a number of  
78 challenges that need to be resolved before this data can be effectively used for PGx.

79 Firstly, SNP arrays do not consider every variant and do not capture on which  
80 haplotype specific information is located, requiring the use of genotype phasing and  
81 imputation. Secondly, *CYP2D6*, an important gene in pharmacogenomics (8) is  
82 highly polymorphic, and it is also affected by CNVs, making the genotyping of this  
83 gene non-trivial. To deliver on the promise of personalized medicine, we need to  
84 bridge these gaps in order to translate available genetic data to clinically relevant  
85 PGx data.

86

87 In parallel with the decreasing cost of genetic testing over the past decade, the  
88 number of large-scale biobank initiatives has also increased. Jointly, these biobanks  
89 have now generated genotype data for millions of individuals (9–12). This provides  
90 an opportunity to repurpose readily available genetic data to develop and validate  
91 the use of SNP array data for generating PGx passports. This would allow  
92 researchers to return clinical-grade PGx results to biobank participants, thereby  
93 decreasing the barriers to applying pre-emptive PGx testing and facilitating  
94 personalized medicine in clinical settings.

95

96 Another problem is that the disclosure of PGx information so far has mainly been  
97 limited to researchers, clinicians, and pharmacists. Yet sharing relevant PGx  
98 information with citizens is important to improve knowledge and understanding of  
99 PGx testing and its related health outcomes. Digital health technologies, including  
100 mobile phone applications, have increased citizen engagement in the last 10 years  
101 (13,14), and they allow patients to be engaged in the healthcare decision-making  
102 process. Implementation of digital health technology in optimizing medication  
103 adherence in patients with depression, respiratory diseases, and cancers has been

104 shown to improve patient outcomes. However, the use of digital health technologies  
105 to provide PGx information to patients has been limited. However, with growing  
106 populations throughout the world, governments are now actively stimulating the  
107 development and use of such tools. For instance, the recent Integral Care  
108 Agreement in the Netherlands highlights the importance of digitalization to promote  
109 self-reliant digital healthcare (15).

110

111 In the northern Netherlands, the Lifelines Cohort Study, a multigenerational,  
112 longitudinal, dynamic cohort and biobank, presents a unique opportunity to leverage  
113 available genetic data to facilitate healthy aging (16). This biobank has been  
114 genotyping its participants for multiple years, as has the separate Lifelines NEXT  
115 prospective birth cohort biobank. In this study, we developed and clinically validated  
116 1) an automated software tool for the interpretation of array-based genotype data to  
117 generate reliable PGx profiles, 2) a layperson-friendly translation of Dutch  
118 Pharmacogenetics Working Group (DPWG) guidelines, and 3) a digital infrastructure  
119 to communicate these to biobank participants. By developing this tool, we aim to  
120 improve the lives of patients and the general population, starting with the population  
121 of the northern Netherlands and expanding to more individuals in the future.

122

## 123 **2. Methods**

### 124 *2.1 Datasets and quality control*

125 We used four different datasets to develop and validate the automated generation of  
126 PGx passports, divided over two different versions of Illumina Genotyping arrays. We  
127 used 38,030 samples from the UMCG Genetics Lifelines Initiative (UGLI) cohort of  
128 the Lifelines prospective follow-up biobank (17) to develop and validate an

129 automated PGx passport pipeline using the Infinium Global Screening Array®  
130 MultiEthnic Disease (GSA-MD) version 1.0 array. In parallel, we used three datasets  
131 to develop the pipeline for the GSA-MD version 3.0 array: 2473 samples from our  
132 Genome Diagnostics patient cohort (UMCG), 77 validation samples with known PGx  
133 genotypes, and another 574 samples from the Lifelines NEXT cohort (18).  
134  
135 The samples of the Lifelines UGLI cohort were genotyped using GSA-MD version  
136 1.0. We performed quality control on both samples and markers, including removal of  
137 samples and variants with a low genotyping call rate (<97%), variants showing  
138 deviation from Hardy-Weinberg equilibrium ( $p < 1 \times 10^{-6}$ ), excess of Mendelian errors  
139 in families (>1% of the parent–offspring pairs), and samples with very high or low  
140 heterozygosity (4 standard deviations (SD) above or below the mean for autosomes).  
141 We further revised and removed samples that did not show consistent information  
142 between reported sex and genotypes on the X chromosome, or between reported  
143 familial information and observed identity-by-descent sharing with family members.  
144 All other samples were genotyped using GSA-MD version 3.0 and were quality-  
145 controlled similarly to those in Lifelines UGLI. In total, 36,373 Lifelines UGLI  
146 samples, 470 Lifelines NEXT samples, 2285 validation samples of the Genome  
147 Diagnostics patient cohort, and 76 validation samples with known PGx genotypes  
148 passed quality control.

149

## 150 *2.2 Selecting individuals to receive pharmacogenetic results*

151 Quality control measures in research settings are commonly less stringent than in  
152 diagnostics. Since Lifelines UGLI samples were genotyped in a research setting, this  
153 dataset could potentially contain sample swaps. Therefore, we used Idéfix (19) to

154 select a high-quality subset of 5,765 samples suitable for returning personalized  
155 results. In short, Idéfix selects those samples for which the actual phenotypes  
156 sufficiently match the predicted phenotypes based on genetic predispositions. These  
157 genetic predispositions were determined by calculating polygenic scores (PGSs) per  
158 phenotype. These calculations aggregate the effects of common risk-decreasing or -  
159 increasing alleles identified by GWAS. Here, we reran Idéfix using an updated list of  
160 PGSs based on recent GWAS. Quality control, PGS calculation, and running Idéfix  
161 were performed as described in Warmerdam et al. (19). Finally, we returned PGx  
162 results to 996 active Lifelines participants who gave consent to receive their PGx  
163 passport. For Lifelines NEXT, we were able to manually resolve sample swaps  
164 based on family data and duplicated array runs. We returned PGx results to 231  
165 mothers registered as active Lifelines NEXT participants who gave consent to  
166 receive their PGx passport.

167

### 168 *2.3 Variant calling*

169 Variants were called in two separate stages. In general, we used the Opticall  
170 software (20) to do genotype-calling on the majority of variants. However, Opticall is  
171 not suitable for genotyping variants covering frequent CNVs. Since CYP2D6 is  
172 affected by relatively frequent CNVs, it is not trivial to genotype variants within and  
173 near this gene. At the same time, inclusion of CYP2D6 is essential to return a  
174 comprehensive PGx passport because it metabolizes a large proportion of  
175 medication. We therefore developed a novel algorithm for CNV-calling of the  
176 CYP2D6 gene using the data obtained from a SNP array. In addition, this method  
177 also performs genotype-calling of individual variants in the CYP2D6 gene.

178

### 179 2.3.1 *CYP2D6*

180 SNP arrays have been used extensively to study both SNPs and CNVs. Modern  
181 SNP arrays genotype at hundreds of thousands of assays (probes designed to  
182 genotype one particular variant) simultaneously by measuring the color and intensity  
183 of light emitted when one of four labeled nucleotides hybridizes at the assays. In  
184 addition to enabling study of which alleles are present in an individual through  
185 comparison of the colors of the emitted light, it also allows study of CNVs by  
186 combining the total signal intensity. We combined these two approaches in our  
187 *CYP2D6* genotyping methodology, as described below.

188

189 For genotyping *CYP2D6*, we first selected a number of independent, high-quality  
190 variants from the quality-controlled genetic data (missingness < 0.01, minor allele  
191 frequency (MAF) > 0.05, Hardy-Weinberg equilibrium p-value > 0.05, *HLA* excluded,  
192 minimum distance of 100kb between variants,  $R^2 < 0.4$ ). Using these variants, our  
193 method performs a principal component analysis of the intensities of the selected  
194 variants (summed across the two alleles). As the first principal components (PCs)  
195 likely tag batch effects, we chose to regress out the first 100 PCs from the genomic  
196 region of interest – the *CYP2D6* gene – using ordinary linear regression (OLS). Both  
197 PC loadings and OLS regression parameters can be estimated in one dataset, and  
198 later applied in another. The methodology for correcting SNP array intensities follows  
199 the approach previously established by Lude Franke et al. (21).

200

201 After correction for batch effects, one variant is selected to assign naive CNV-calls  
202 (rs1135824 for GSA-MDv1, rs1423323203 for GSA-MDv3). Naive, preliminary CNV  
203 assignments are made by binning the total signal intensity of the selected variant so



204 that the proportions of CNV genotypes match the expected frequency of CNV-calls.  
205 The expected frequencies ( $*5 = 0.0295$ , Duplication = 0.0275) are obtained from  
206 PharmGKB (<https://www.pharmgkb.org/page/cyp2d6RefMaterials>, European  
207 population). Using the means and SDs of the signal intensities for each bin, a naive,  
208 preliminary CNV call is assigned to every individual based on which CNV bin has the  
209 highest likelihood at the signal intensity of the specific variant. If multiple GSA probes  
210 are available for a variant, a majority voting ensemble classifier is used to obtain a  
211 consensus of the various assays. Next, genotyping is performed using a manually  
212 selected set of variants. These variants are selected based on whether the individual  
213 signal intensities show clusters of genotypes in accordance with what can be  
214 expected for a biallelic variant with possible deletions and duplications (i.e., at least  
215 six visible intensity clusters rather than the three intensity clusters expected when  
216 dealing with a biallelic variant outside a CNV).  
217  
218 For each variant and possible copy number, a nearest-neighbors classifier is used to  
219 obtain a set of highly confident samples for every variant. Then, to perform  
220 genotyping, the theta of every sample is calculated based on its intensities. For this,  
221 the median of the intensities for the samples naively assigned to the group of  
222 homozygous deletions is used as the origin. Thereafter, samples are binned into  $k$   
223 bins, where  $k$  corresponds to the number of genotypes that can be expected for a  
224 biallelic variant at each copy number. Bins are assigned genotypes so that they best  
225 match Hardy-Weinberg principles. Per variant, naive genotype clusters are then  
226 iteratively improved in a gaussian mixture model algorithm adapted from *scikit-learn*  
227 (22). The maximization step in the gaussian mixture model algorithm was changed to  
228 also weight genotypes according to Hardy-Weinberg principles, which were

229 expanded to also take deletions and duplications into account. Per variant, this  
230 procedure is performed while accounting for the intensity measures of all assays  
231 tagging that specific variant.

232

233 For each combination of a variant, sample and copy number, a total probability is  
234 calculated by summing the probabilities across the genotypes corresponding to that  
235 copy number. Subsequently, the most likely copy number is assigned to each  
236 variant-sample combination by selecting the copy number with the largest total  
237 probability among the possible copy numbers. The CNV status of *CYP2D6* as a  
238 whole is determined by summing the probabilities of variants over all possible copy  
239 numbers, and rescaling these to sum to one. Genotype probabilities are then  
240 calculated by rescaling the possible genotype probabilities in the assigned copy  
241 number status to one.

242

243 Genotypes of samples with 1 or 2 *CYP2D6* copies (across both the maternal and  
244 paternal chromosome) are written so that genotypes of samples with single-gene  
245 deletions are homozygous for the reanalyzed variants. Genotypes for variants of  
246 samples that are homozygous for whole-gene deletions do not exist. In human  
247 genetic datasets, the representation of genotypes for variants of samples with a  
248 *CYP2D6* duplication is not trivial, making the imputation and phasing non-trivial.  
249 Therefore, these samples are excluded. *CYP2D6* variants in chromosome 22  
250 genotyped using Opticall are replaced with the newly genotyped *CYP2D6* variants.  
251 This is subsequently used in the phasing and imputation pipeline. The *CYP2D6*  
252 CNV-calling algorithm is included as the first part of the *Asterix* software that we  
253 developed to generate PGx profiles.

## 254 2.4 Phasing and imputation pipeline

255 Before phasing and imputation, PLINK files are lifted from Human genome build 37  
256 to build 38 and alleles of insertions and deletions are recoded to match the notation  
257 in the reference dataset. Then, variants for which the strands do not match the  
258 reference panel are removed, and variants with >5% missingness or a Hardy-  
259 Weinberg p-value  $< 1 \times 10^{-6}$  are removed. Phasing and imputation are implemented  
260 using Eagle v2.4.1 (23) and Minimac4 (24)(version 1.0.2). The reference dataset for  
261 phasing and imputation is derived from the 1000 Genomes project 30x coverage  
262 whole genome sequencing dataset (25). Finally, we replaced the imputed genotypes  
263 with the original genotypes for the variants that were used as input in the imputation.

264

## 265 2.5 Crucial backbone

266 A minimum set of variants that should be included in our genotyping panel was  
267 determined per gene (see Table S1). We used available 'tier 1' recommendations for  
268 *CYP2C9*, *CYP2C19*, *CYP2D6*, *CYP3A4*, *CYP3A5*, and *VKORC1* (26–29). For the  
269 other genes in our PGx passport, we assessed the variants/alleles that were  
270 mentioned in DPWG background information and those that are included in our  
271 validation dataset. We included a variant in the crucial backbone when: 1) the variant  
272 results in an allele known to alter the drug response phenotype, and 2) the MAF in  
273 the (North-Western) European population is  $> 0.001$ .

274

## 275 2.6 Validation

276 We validated GSA-MD versions 1 and 3 and *Asterix* following the clinical genome  
277 diagnostic standards in our center. The validation parameters and corresponding  
278 acceptance criteria are shown in Table 1.

279 *Table 1: Validation parameters and acceptance criteria for the clinical validation of the Infinium Global Screening*  
280 *Array MultiEthnic Disease versions 1 and 3, and the software tool Asterix. ‡For all variants available in both*  
281 *gnomAD-NFE and GoNL datasets, the distribution of mutant allele frequency differences between those two*  
282 *datasets was recorded. Z represents the standard deviation of that distribution. Variants that deviated more than*  
283 *3\*Z from the gnomAD-NFE mutant allele frequency failed validation.*

| Topic                          | Validation parameter                       | Acceptance criterium |
|--------------------------------|--------------------------------------------|----------------------|
| Quality of the array data      | Call rate                                  | <sup>3</sup> 0.97    |
| Phasing and imputation quality | Concordance with trio-data                 | <sup>3</sup> 0.97    |
|                                | R <sup>2</sup>                             | <sup>3</sup> 0.97    |
| Result interpretation          | Absolute number of mutant alleles detected | <sup>3</sup> 5       |
|                                | Mutant allele frequency                    | <3*Z‡                |
|                                | Concordance with known genotypes           | 100%                 |

284

285 We created a benchmark set of haplotypes using data of 621 (GSA-MD v1) and 135  
286 (GSA-MD v3) parent–offspring trios to validate phasing performance. Using  
287 *SHAPEIT5* (30) we then compared the results of our statistical phasing with the  
288 benchmark haplotypes and computed the switch error rates (SER) of all genetic  
289 variants that were directly typed. The call rate and imputation quality are validated  
290 based on the output of our quality control procedures. Variants were removed if: 1)  
291 they were not directly genotyped nor imputed, 2) they were not in the crucial  
292 backbone and had a low imputation probability ( $R^2 < 0.97$ ), 3) the mutant allele was  
293 observed < 5 times in the full dataset, 4) the mutant allele frequency deviated more  
294 than 3\*Z from the gnomAD-non-Finnish Europeans (NFE) mutant allele frequency (Z  
295 represents the SD of differences in mutant allele frequency between the GoNL and  
296 gnomAD-NFE datasets), 5) the phasing SER was > 0%, or 6) the concordance with  
297 known genotypes of validation samples was < 100%.

298

299 When a variant was in the crucial backbone, but the imputation probability was low,  
300 we used haploid-level dosage (HDS) to assess the variant call confidence level in an  
301 individual sample.

302

303 In addition to variant calling, we also validated our CNV-calling algorithm. To that  
304 end, we selected samples with a confidence score of  $> 0.97$  (1x zero copies, 14x one  
305 copy, and 16x two copies) and samples with a confidence score of with a CNV-  
306 calling confidence score of  $> 0.9$ , and  $< 0.97$  (4x one copy, 3x two copies and 5x  
307 three copies). DNA of these samples was analyzed with a dedicated TaqMan real-  
308 time PCR assay specifically targeting exon 9 of the *CYP2D6* gene (Certe,  
309 Groningen, the Netherlands). It is worth noting that this assay cannot detect gene  
310 duplication or hybrid alleles. However, as we report *CYP2D6* to be not available  
311 when  $>2$  copies of *CYP2D6* are detected, these calls do not currently require  
312 validation.

313

314 Finally, we confirmed that the software we developed correctly translated 1) the  
315 detected mutations to the corresponding star alleles and, subsequently, 2) the  
316 combination of haplotypes to the corresponding contraindication (CI) and/or  
317 predicted phenotype. This is described in more detail in section 2.9.3 and in the  
318 Supplementary Information.

319

### 320 *2.7 Pruning of allele definition tables*

321 We used gene-specific allele definition tables to assign star alleles. Available tables  
322 were downloaded from PharmVar (v5.2.14 for GSA-MD version 3; v6.0.5 for GSA-  
323 MD version 1) for *CYP2B6*, *CYP2C9*, *CYP2C19*, *CYP2D6*, *CYP3A4*, *CYP3A5* and

324 *NUDT15* and from PharmGKB for *ABCG2* and *TPMT*  
325 (<https://www.pharmgkb.org/page/pgxGeneRef>). Custom tables were constructed for  
326 *MTHFR*, *SLCO1B1* and *VKORC1*. We curated all allele definition tables for the GSA-  
327 MD versions 1 and 3 separately and removed all variants that did not pass  
328 acceptance criteria (Tables S2a-b). We then pruned each table to prevent  
329 ambiguous calls caused by haplotypes that we cannot distinguish based on the  
330 variants included in our pipeline. The resulting allele definition tables are shown in  
331 Tables S3a-x.

332

### 333 *2.8 Translation to pharmacogenetic contraindication*

334 To translate the diplotype to the PGx CI used in medication surveillance, we  
335 designed custom translation tables (see Tables S4a-l). Allele function of individual  
336 star alleles and their translation into predicted phenotype and PGx CI are based on  
337 PharmVar, PharmGKB, and/or DPWG background information. All possible  
338 diplotypes based on the pruned allele definition tables are included in the translation  
339 tables. We made sure the PGx CIs correspond to those used in the DPWG  
340 recommendations.

341

### 342 *2.9 Generating PGx profiles*

343 We developed the *Asterix* tool to produce PGx profiles from genotyping data from  
344 the GSA-MD versions 1 and 3. *Asterix* is composed of four main tasks: 1)  
345 determining the *CYP2D6* copy number status, 2) determining star alleles, 3)  
346 translating these to predicted phenotypes and PGx CIs, and 4) constructing a  
347 logging file.

348

349 *2.9.1 Determining star alleles, predicted phenotypes, and PGx CIs*

350 After correction of the *CYP2D6* genotypes based on the CNV status, star alleles for  
351 all included genes are assigned using the gene-specific allele definition tables.

352 Subsequently, predicted phenotypes and PGx CIs are determined with the custom  
353 translation tables. When determining star alleles present for *CYP2D6*, *Asterix* takes  
354 into account whether whole-gene deletions (*CYP2D6\*5*) were detected in CNV-  
355 calling.

356

357 *2.9.2 Constructing a logging file*

358 To be able to check *Asterix* output, an extensive logging file is constructed that  
359 contains information for several checkpoints in our pipeline. Parameters that are  
360 logged include the estimated phased haploid-level dosage (HDS) when < 0.97 (only  
361 for imputed genotypes), missing variants, and haplotypes that were not described in  
362 translation tables. Identical haplotypes are merged together to simplify the validation  
363 process.

364

365 *2.9.3 Approval and release of the PGx profiles*

366 The PGx profiles generated are to be released by a registered pharmacist. To  
367 maximize process efficiency, the approval and release of the PGx profiles is  
368 performed on the level of unique combinations of detected mutations and unreliable  
369 calls. When a sample contains only previously approved haplotypes, it is  
370 automatically released. Each decision is logged to maintain an audit trail. The  
371 procedure for approving and releasing the profiles is described in more detail in the  
372 Supplementary Information.

373

374 *2.10 Building layperson-friendly PGx passports*

375 The output of *Asterix* is a PGx profile that is suitable for application in clinical practice  
376 by healthcare practitioners. However, (future) patients should not be expected to  
377 understand the meaning or implications of such a profile. We therefore developed a  
378 layperson-friendly digital PGx passport to fulfill the informational needs of (future)  
379 patients.

380

381 *2.10.1 Developing layperson-friendly communication materials*

382 We aimed to develop communication materials that explain the impact of drug–gene  
383 interactions (DGIs) that are understandable for 90% of the study population. We  
384 developed layperson-friendly texts based on the DPWG guidelines for healthcare  
385 practitioners (see Table S5), written at Common European Framework of Reference  
386 Common Reference Level B2 (31). One important difference that we had to address  
387 is that the DPWG guidelines do not contain an explanation for normal metabolizers  
388 because standard-of-care applies for these patients. However, texts for the (future)  
389 patient do need to cover this topic because it is valuable to explain that standard-of-  
390 care applies. The texts are constructed using three building blocks (Figure 1).

391



|                                                         |                                                                                                                  |
|---------------------------------------------------------|------------------------------------------------------------------------------------------------------------------|
| <p><b>Block 1: Predicted influence of your DNA.</b></p> | <p><b>Predicted influence of your DNA</b></p> <p>or pharmacist can tell you more about the appropriate dose.</p> |
|---------------------------------------------------------|------------------------------------------------------------------------------------------------------------------|

392

393 *Figure 1: Building blocks used to construct layperson-friendly texts to explain Drug–Gene interactions (left) and*

394 *the corresponding text for CYP2D6 PM-amitriptyline (translated from Dutch, right).*

395

## 396 2.10.2 Digital infrastructure

397 We created a DGI table that contains all the CIs produced by *Asterix*, a list of known  
398 DGIs currently in the DPWG guidelines, and the layperson-friendly texts associated  
399 to each combination of these. The relevant texts for each participant are selected  
400 based on their PGx profile and known DGIs. For example, the text explaining the  
401 consequences for amitriptyline in Figure 1 will be selected for the individuals who are  
402 listed as CYP2D6 PM in their PGx profile. The PGx profile and corresponding texts  
403 are subsequently unlocked through an Application Programming Interface (API)  
404 following the Health Level Seven Fast Healthcare Interoperability Resources (HL7-  
405 FHIR) format. Participants can view their PGx passport in the mobile application  
406 (app) *Gen en Geneesmiddel*, which we developed with Synappz Digital Healthcare  
407 and which is available for iOS and Android (see Figure 5).

408

## 409 2.10.3 Additional features

410 Upon installing the app, the user is shown a series of information screens that  
411 explain PGx and the content and use of the app. This information can be reviewed  
412 within the app after completion of this initial onboarding process. Furthermore,  
413 frequently asked questions (FAQ) are included in the app to address several  
414 anticipated questions. The FAQ-section is supplemented by new questions from  
415 users and associated answers.

416

417 The layperson-friendly texts displayed in the mobile application are accompanied by  
418 articles that describe the PGx CI that interacts with the drug being viewed (see Table  
419 S5). When multiple PGx CIs are relevant for the drug being viewed, all the relevant  
420 articles are shown. The articles provide interested participants with more detailed

421 information and facilitate communication between (future) patients and healthcare  
422 practitioners.

423

424 Finally, a technical report aimed at healthcare practitioners can be downloaded from  
425 the app. This report contains the PGx profile and accompanying information,  
426 including contact information for a helpdesk and instructions on how to interpret and  
427 process the results.

428

### 429 **3. Results**

#### 430 *3.1. Pharmacogenomic profiles and passports*

431 To validate the use of a layperson-friendly, clinical-grade PGx passport using  
432 oligonucleotide arrays, we have developed a tool (*Asterix*) to produce PGx profiles  
433 from genotyping data from the GSA-MD versions 1 and 3. As described in Figure 2a,  
434 our tool works by determining the *CYP2D6* copy number, phasing and imputing  
435 genetic variants, determining the star alleles of the samples provided, and translating  
436 diplotypes to PGx CIs. Instructions on the installation and use of *Asterix* are  
437 described on the GitHub repository (<https://github.com/molgenis/asterix>).

438

#### 439 *3.2. Validation*

440 A total of 34 variants, in 12 genes, were included in the crucial backbone of the PGx  
441 pipeline, and subsequently underwent validation (Table 2). For *CYP2B6* we initially  
442 also included rs3211371 (\*5). However, since the DPWG withdrew CI definitions  
443 differentiating *CYP2B6*\*5 from \*1, we removed this SNP from the crucial backbone.  
444 Three variants in *CYP2C9* (rs28371686 (\*5), rs9332131 (\*6) and rs7900194 (\*8))  
445 were initially included in the crucial backbone based on their multiethnic allele

446 frequency (26). However, since each of these variants had a MAF < 0.001 in the  
 447 NFE population, we subsequently excluded them from the crucial backbone for GSA-  
 448 MD v1. It is important to note that the Lifelines population is known to be reflective of

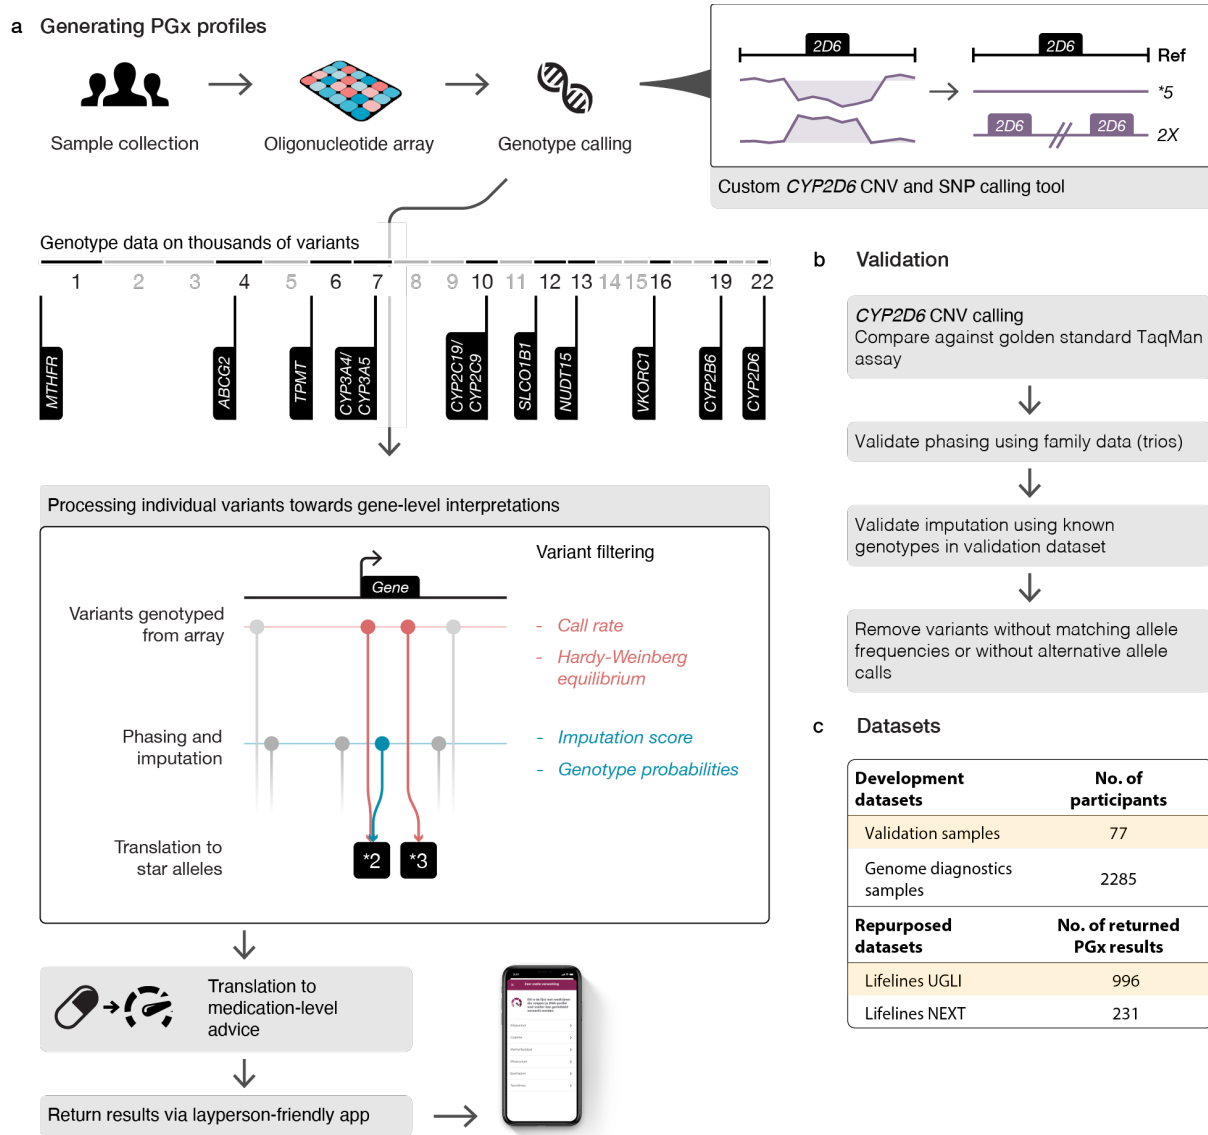

449  
 450 *Figure 2: Overview of the work in this paper. (a) Schematic of the pharmacogenetic (PGx) pipeline developed to*  
 451 *generate PGx profiles. Data collection involves obtaining DNA samples from participants and genotyping using*  
 452 *an oligonucleotide array. We ascertain CYP2D6 copy numbers (CN) using a custom CNV calling approach. This*  
 453 *method estimates CN status at multiple points within the CYP2D6 gene and integrates these estimates to*  
 454 *determine the overall gene copy number status. Twelve genes contribute to the generation of PGx profiles. The*  
 455 *combined effects of these genes are aggregated into medication-level recommendations, which are*  
 456 *communicated to participants via a layperson-friendly app. (b) Broad overview of the methodology used for*



|         |             |            |                           |        |                  |                           |
|---------|-------------|------------|---------------------------|--------|------------------|---------------------------|
|         | rs28371685  | 0.0029     | direct                    |        | direct           |                           |
| CYP2D6  | rs1135840   | 0.5588     | imputation                | 0.87   | imputation       | 0.93                      |
|         | rs16947     | 0.3347     | imputation                | 0.89   | imputation       | 0.96                      |
|         | rs35742686  | 0.0170     | imputation                | 0.79   | imputation       | 0.82                      |
|         | rs3892097   | 0.1986     | imputation                | 0.91   | imputation       | 0.92                      |
|         | rs5030655   | 0.0117     | imputation                | 0.61   | imputation       | 0.27                      |
|         | rs5030656   | 0.0285     | imputation                | 0.67   | imputation       | 0.70                      |
|         | rs1065852   | 0.2225     | imputation                | 0.91   | imputation       | 0.95                      |
|         | rs28371706  | 0.0011     | direct                    |        | imputation       | 0.86                      |
|         | rs61736512  | 0.0006     | imputation                | 0.04   | imputation       | 0.97                      |
|         | rs59421388  | 0.0006     | imputation                | 0.04   | imputation       | 0.97                      |
|         | rs1058164   | 0.5525     | imputation                | 0.86   | imputation       | 0.93                      |
|         | rs28371725  | 0.0955     | imputation                | 0.84   | direct           |                           |
|         | CYP3A4      | rs35599367 | 0.0492                    | direct |                  | direct                    |
| CYP3A5  | rs776746    | 0.9311     | direct                    |        | direct           |                           |
|         | rs10264272  | 0.0009     | direct                    |        | direct           |                           |
|         | rs41303343  | 0.0004     | (imputation) <sup>b</sup> | (0.96) | n/a <sup>b</sup> |                           |
| MTHFR   | rs1801133   | 0.3373     | direct                    |        | direct           |                           |
| NUDT15  | rs116855232 | 0.0029     | direct                    |        | direct           |                           |
| SLCO1B1 | rs4149056   | 0.1587     | direct                    |        | direct           |                           |
| TPMT    | rs1800462   | 0.0024     | imputation                | 0.46   | direct           | <5<br>mutants<br>detected |
|         | rs1800460   | 0.0382     | imputation                | 0.96   | direct           |                           |
|         | rs1142345   | 0.0423     | imputation                | 1.00   | direct           |                           |
| VKORC1  | rs9923231   | 0.3779     | direct                    |        | direct           |                           |

475

476 We considered 731 and 703 variants outside the crucial backbone for inclusion in the  
477 translation tables of GSA-MD v1 (PharmVar tables v6.0.5) and GSA-MD v3  
478 (PharmVar tables v5.2.14), respectively. Results of the validation process are  
479 summarized in Figure 3 and are fully available in Tables S2a-b. Many variants were  
480 removed due to unavailability on the genotyping arrays and in the imputation panel.  
481 Beyond that, poor imputation score and/or low allele frequency were the leading  
482 reasons for exclusion. Phasing quality was verified by comparison to phasing results  
483 using parent–offspring trios. Poorly phased variants were retained when they were

484 the only variant of interest in that gene, rendering phasing irrelevant. Importantly, 37  
 485 variants were typed in 76 validation samples, using a traditional DNA amplification  
 486 genotyping method (Leiden University Medical Center). For all 37 variants, the  
 487 genotypes derived from GSA-MD v3 (19 directly typed, 18 imputed) were a 100%  
 488 match to the traditional assays.  
 489

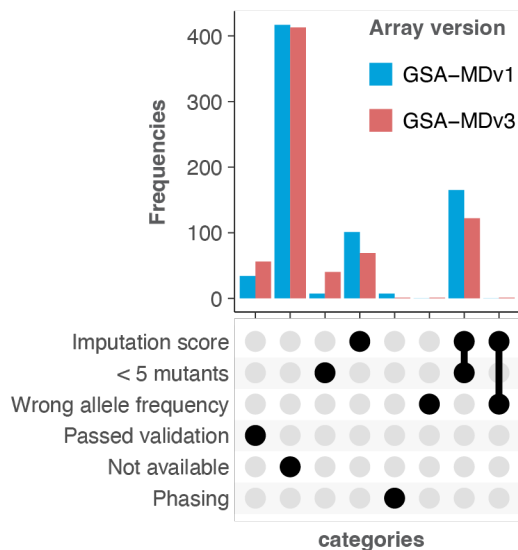

490  
 491 *Figure 3: Validation status of variants from the PharmVar translation tables outside the crucial backbone. The*  
 492 *UpSet plot displays the frequency of variants that either meet or fail to meet the validation criteria. Columns with*  
 493 *a single marked circle represent the frequency of variants failing exclusively that criterion, while columns with*  
 494 *multiple marked circles indicate variants that failed multiple corresponding criteria.*

495 Within *Asterix*, we embedded a custom *CYP2D6* copy number (CN) calling  
 496 algorithm. To validate the *Asterix*-derived *CYP2D6* CN calls, a total of 43 samples  
 497 were selected, representing a CN probability of at least 0.9 and each of the four  
 498 possible CN calls (zero copies, one copy, two copies, and three copies). The CN  
 499 status of the aforementioned samples was determined using a dedicated TaqMan  
 500 assay targeting exon 9. To compare the results, we initially evaluated whether the  
 501 overall CN calls with a moderate probability of over 0.9 matched the calls reported by  
 502 the TaqMan assay (Figure 4a). Of the 43 samples, *Asterix* identified three as having

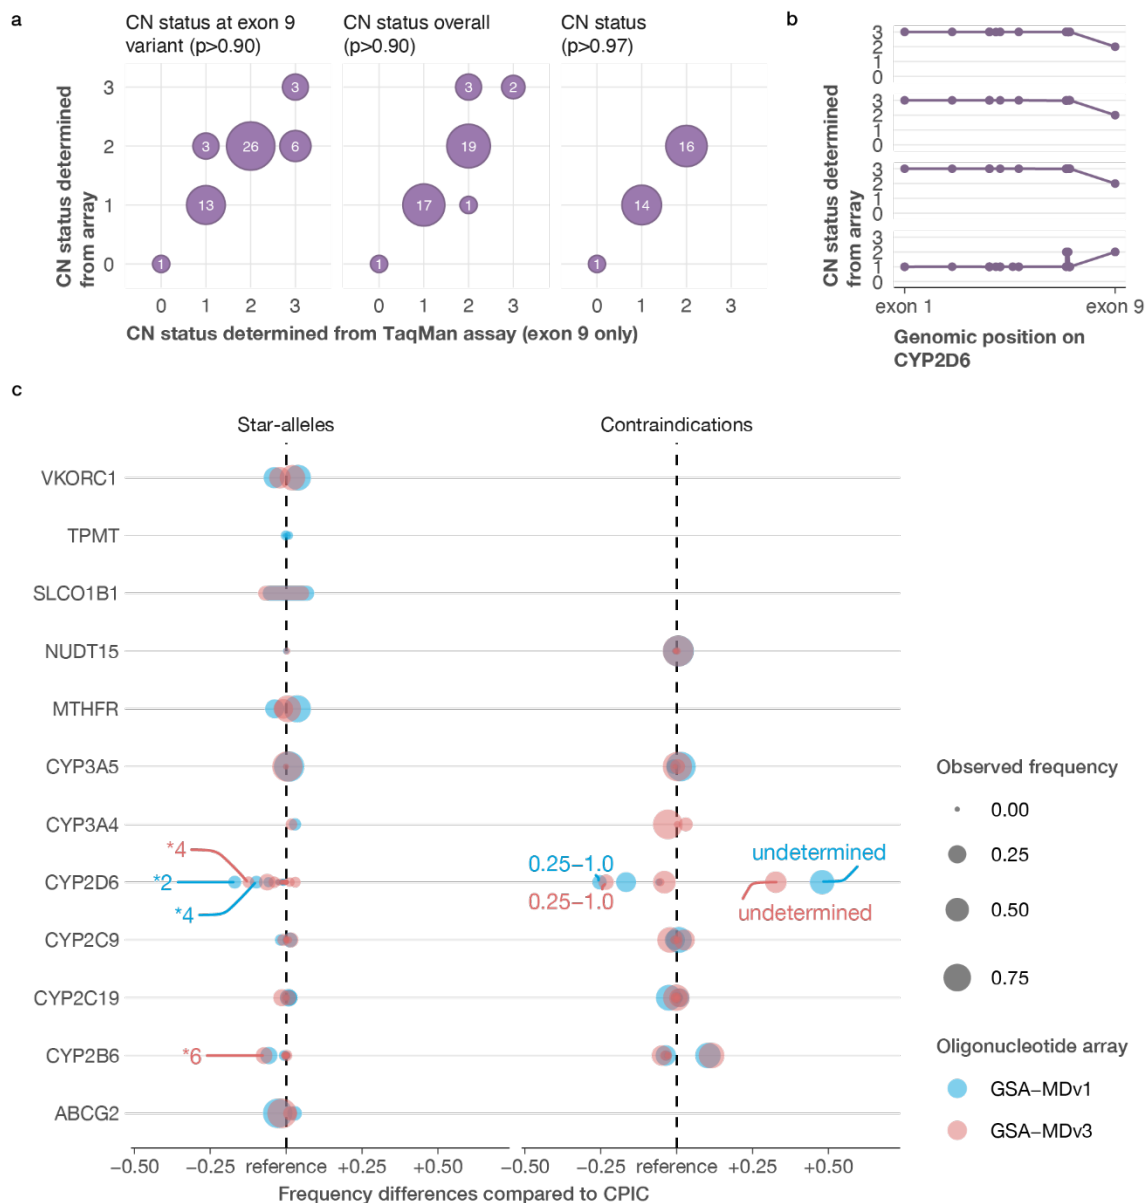

503

504 *Figure 4: Validation results of CYP2D6 CNV-calling (a, b). a) correspondence between a standard CYP2D6 CNV-*

505 *calling procedure using a TaqMan assay (x-axis) and the CNV-calling results determined using GSA-MD v3 and*

506 *our specially designed algorithm. Only exon 9 was assessed in the TaqMan assay. The y-axis for the three*

507 *graphs shows the copy number (CN) status determined from the array for a variant at exon 9 only (left), for the*

508 *overall CN status at a probability threshold of 0.90 (middle), and for the overall CN status at a probability*

509 *threshold of 0.97 (right). b) the CN status for the four deviating samples with a probability threshold of 0.90 over*

510 *all variants included in the CNV-calling algorithm. c) Haplotype frequency differences compared to the*

511 *frequencies reported by CPIC (left) and contraindication frequency differences compared to the frequencies*

512 *reported by CPIC (right).*



513 a CYP2D6 duplication (three copies), whereas the TaqMan assay reported these  
514 samples as homozygous reference (two copies). In one instance, *Asterix* reported a  
515 heterozygous deletion (one copy) while the TaqMan assay returned a homozygous  
516 reference call. However, for these four samples, *Asterix* consistently reports a  
517 homozygous reference call at exon 9, which is consistent with the call reported by  
518 the TaqMan assay. For the majority of the other variants, *Asterix* reports calls  
519 matching that of the overall aggregated estimate (Figure 4b). This suggests that  
520 these samples are likely to possess a hybrid allele or tandem arrangement, resulting  
521 in a distinct CN call at exon 9. It is worth noting that the TaqMan assay is not  
522 capable of differentiating between regular copy numbers and hybrid alleles. At a  
523 probability of at least 0.97, all 31 samples exhibit matching CN calls.

524

525 Based on the validated variants, final translation tables were created to first translate  
526 variants to haplotypes (Tables S3a-x) and then to translate diplotypes to CI (Tables  
527 S4a-l). These tables were then used as input for *Asterix* to create preliminary PGx  
528 profiles for 996 Lifelines participants and 470 Lifelines NEXT participants. Approval  
529 (or adjustment) and release by a registered pharmacist resulted in the final PGx  
530 profiles. Haplotype frequencies were compared to reference frequencies in a  
531 European population (source: Clinical Pharmacogenetics Implementation  
532 Consortium (CPIC)) or NFE (source: DPWG/gnomAD) (Figure 4 and Tables S6a-b).

533

534 Finally, the technical PGx profiles were shared with the biobank participants in the  
535 smartphone application *Gen en Geneesmiddel* (Figure 5). The app links the  
536 technical information in the PGx profile with associated explanatory texts, yielding a  
537 layperson-friendly PGx passport. Rather than using genes as the basic unit of

538 information, the app categorizes drugs into five categories (Figure 5a): poor  
539 metabolism ('very slow'), intermediate metabolism ('slow'), normal metabolism  
540 ('average'), ultrarapid metabolism ('very fast'), and non-metabolic drug–gene  
541 interactions ('other processes'). By selecting one of the categories, users can see a  
542 list of all the medications in that category, based on their pharmacogenetic profile  
543 (Figure 5b). More information can be found on specific medication (Figure 5c), i.e.,  
544 what is it used for and how is it affected by the user's PGx profile. Interested users  
545 can get more information on the associated CIs by proceeding to a linked article.  
546 Finally, the technical information (PGx profile) can be downloaded and/or shared  
547 directly from the app (Figure 5d).

548

549 Based on the PGx profiles we generated using *Asterix*, 92% and 90% of the Lifelines  
550 and Lifelines NEXT populations, respectively, carried at least one actionable PGx CI  
551 (Tables S6a-b list frequencies of PGx haplotypes and CIs). We have returned these  
552 profiles to the biobank participants through the *Gen en Geneesmiddel* app, enabling  
553 them to get optimized (future) drug prescriptions with the help of their physician and  
554 pharmacist.

555

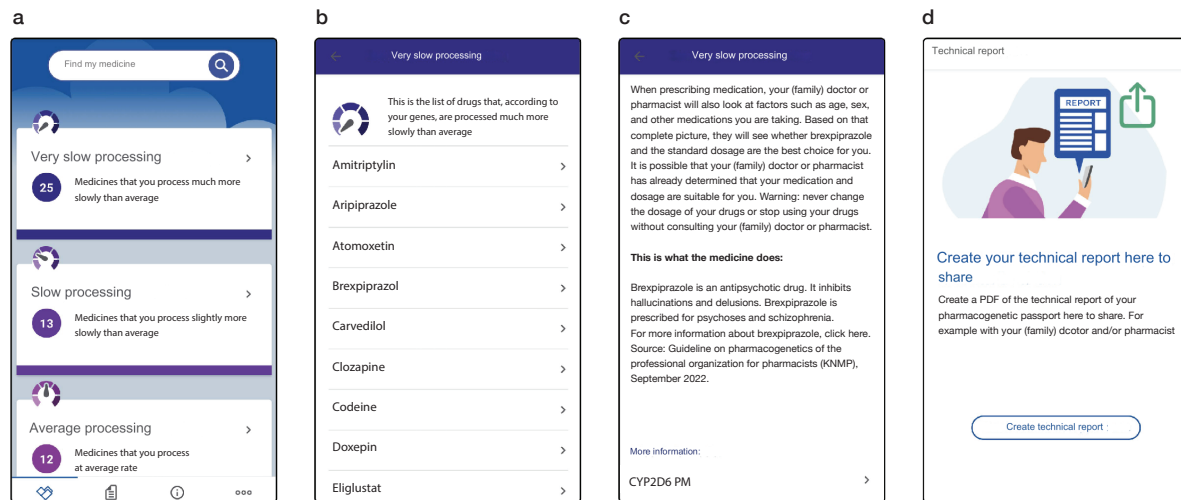

556

557

558

559

560

561

#### 562 4. Discussion

563

564

565

566

567

568

569

570

571

572

573

574

575

Figure 5: Overview of the 'Gen en Geneesmiddel' app (translated from Dutch). a) Main menu, where five categories can be selected: 'poor', 'intermediate', 'normal' and 'ultrarapid' metabolism and 'other processes'. b) A personalized list of medication in the 'poor metabolism' category. c) Explanation of the predicted metabolism of brexpiprazole. d) The pharmacogenetic profile can be saved or shared from the app.

In this study, we use oligonucleotide genotyping arrays to develop a low-cost PGx passport that repurposes existing genotype data from the Lifelines and Lifelines NEXT cohorts for clinical use. We clinically validated the genotyping method by aligning validation parameters and corresponding acceptance criteria to the local clinical diagnostic center and by comparing genotyping results with results from classical PCR-based assays. Using parent–offspring trios, we could also verify the accuracy of haplotype phasing, information that is unavailable when using PCR-based PGx assays. We showed that we could confidently include most of the recommended 'tier 1' PGx variants for the genes included in our study (26–29), with only a few exceptions. *TPMT* was excluded for the GSA-MDv3 oligonucleotide array because variant rs1800462 did not meet validation criteria. In addition, three *CYP2C9* variants classified as tier 1 (mutant allele frequency > 0.001) were excluded from the crucial backbone on the grounds of their much lower allele frequencies in

576 the European population. To apply our pipeline in a broader context, these variants  
577 would need to be validated in a population with higher MAFs.

578

579 Furthermore, to address previously identified barriers to use of PGx passports by  
580 laypeople, we implemented communication of relevant PGx information through a  
581 newly developed smartphone application. As the uptake of the PGx passport  
582 increases, support will be provided for healthcare professionals to properly apply  
583 PGx in their daily practice.

584

#### 585 *4.1 Producing PGx profiles*

586 As the generation of clinically valid PGx profiles from array-based genotype data is  
587 the cornerstone of this study, we discuss this first. We did not include *DPYD*, *FV*,  
588 *HLA-A*, *HLA-B*, *CYP1A2*, and *COMT* in the PGx passport because: 1) *DPYD*  
589 genotyping is already pre-emptively performed in combination with phenotyping in  
590 routine care, 2) the DPWG guidelines for mutations in *FV* were retracted, 3) there is  
591 no allele definition table for determining *HLA* alleles, so we could not use the same  
592 pipeline for this region, and 4) *CYP1A2* and *COMT* are part of DPWG guidelines but  
593 currently do not contain DGIs.

594

595 An important limitation in our passport production is that we could not provide a  
596 complete passport for every individual. The reason is twofold: First, we used  
597 imputation quality ( $R^2$ ) to select imputed variants of sufficient quality. If a variant with  
598 insufficient imputation quality ( $R^2 < 0.97$ ) was in the crucial backbone, the variant  
599 was not removed from the translation tables, as that would lead to the complete  
600 exclusion of the corresponding gene for all individuals. Instead, we use haploid

601 dosage scores to select a subset of individuals with imputed genotypes of sufficient  
602 quality. We could thereby still report results for a subset of individuals. When  
603 applying our method in a diagnostic setting, genotypes should be determined by a  
604 back-up analysis if no reliable result can be extracted from the array data. Second,  
605 our *CYP2D6* CNV-calling is currently aimed at detecting whole gene deletions and  
606 duplications, ignoring potential hybrid alleles. While this is an important limitation, our  
607 method is already able to determine CNV-status on the level of single variants as  
608 opposed to the full locus. So far, we have used this to our advantage to ensure that  
609 CNV-status across the entire gene is consistent, before a whole gene deletions or  
610 duplications is called. However, this could also be used to call hybrid alleles, allowing  
611 us to assess structural variation on a much higher resolution than currently achieved  
612 in diagnostic settings, without the need for more expensive sequencing technologies.  
613 Within the scope of this study however, we were unable to develop this.

614

615 We confirm that actionable PGx variants are present in >90% of the general  
616 population (Table S7), comparable to the percentages reported in literature. In this  
617 implementation study, we were unable to evaluate the impact of these actionable  
618 variants on drug efficacy and adverse effects, due to the scale of our study and the  
619 absence of high-quality prescription records for our study populations. In the future,  
620 we aim to further investigate this by linking prescription data from an external  
621 database through the PharmLines initiative (28).

622

#### 623 *4.2 Layperson-friendly communication of PGx passports*

624 Engaging patients with PGx testing is not limited to increasing their understanding of  
625 genetic information, it is also meant to enable their participation in prescription

626 decisions. Patients who are well-informed about the implications for their prescription  
627 management are better equipped to collaborate with their healthcare providers in  
628 developing personalized treatment plans that align with their needs and preferences  
629 (32). Furthermore, this engagement builds a sense of empowerment and ownership  
630 over one's health, which has been shown to improve adherence to treatment  
631 regimens and to lead to better health outcomes (33).

632

633 The PGx passport, as a digital health tool, facilitates patient engagement by  
634 providing a platform to exchange PGx information and medication management to  
635 enhance patient understanding. By providing layperson-friendly communication  
636 within the PGx passport, it may in the future be used to support patient education  
637 initiatives to broaden the understanding and implementation of pharmacogenomics  
638 across the Netherlands.

639

640 We aimed to develop communication materials that are understandable for 80% of  
641 the general population. Since the Lifelines and Lifelines NEXT cohorts are more  
642 highly educated than the general population, we speculate that the material should  
643 be understandable for around 90% of the study population. In an ongoing  
644 implementation study, we will evaluate the level of comprehension among  
645 participants, so that texts can be better adapted to citizens' needs.

646

647 Several practical decisions were made in the development of the smartphone  
648 application. For example, *CYP3A5* non-expressers (\*3/\*3) were placed in the app  
649 category that represents normal metabolism, while both hetero- and homozygous  
650 expressers are placed in the ultrarapid metabolism category. In the Netherlands,

651 *CYP3A5* non-expressers are most prevalent, so the standard of care applies for  
652 people with this metabolizer status.

653

#### 654 *4.3 Future perspectives*

655 The completion of the PGx passport and smartphone application represents another  
656 step forward on the road toward true personalized medicine. By demonstrating to  
657 healthcare professionals how incorporating PGx into daily practice works to  
658 streamline prescribing practices through the added value of reduced adverse effects,  
659 the PGx passport aims to lower the barrier to making key prescription decisions.

660

661 Although clinical implementation of PGx has picked up pace in the past years, it has  
662 not yet been integrated into routine care. One of the main barriers here is likely to be  
663 the lack of strong evidence that its application effectively improves healthcare and  
664 reduces healthcare costs, which are both prerequisites for reimbursement (34).

665 Other important potential barriers are the complexities associated with integrating  
666 genetic data into electronic health records and the need to ensure that healthcare  
667 professionals have the requisite expertise and resources to comprehend and utilize  
668 PGx insights (35,36). Previous research at our center has shown that, although  
669 these barriers exist, they can be overcome (2).

670

671 In this study, we have demonstrated that PGx passports can be generated much  
672 more cheaply than the currently prevailing methodologies. However, the efficacy and  
673 cost-effectiveness of pre-emptive PGx testing still needs to be more thoroughly  
674 proven, and this will require the inclusion of large numbers of participants from the  
675 general population. Only then will the numbers of drug prescriptions dispensed

676 based on the information in a PGx passport be sufficient to perform quantitative  
677 analysis of adverse effects and/or treatment effectiveness. As the PGx passport is  
678 currently limited to the Netherlands, the findings on cost-effectiveness would only be  
679 applicable to the Netherlands. However, with the push to harmonize the European  
680 Health Data Space, demonstrating cost-effectiveness in the Netherlands will enrich  
681 the changing digital health space. Lastly, as the initial data was derived from the  
682 Lifelines biobank, incorporating *Asterix* into future investigations in Lifelines would  
683 enable more in-depth research into the interplay between genetic variation,  
684 environment, population health, and pharmacotherapy.

685

#### 686 *4.4 Concluding remarks*

687 This study provides a method to produce low-cost, clinically validated PGx profiles  
688 for use by healthcare professionals from genotype array data. As more and more  
689 individuals are genotyped, both in academic and healthcare settings, translating  
690 available genetic data towards clinical decision-making will be essential for  
691 personalized care. Furthermore, we have developed a smartphone application to  
692 ensure that the results from our pipeline, *Asterix*, reach those whose health may be  
693 impacted. To break down barriers to patient engagement, the application provides a  
694 novel approach to understandably communicate PGx results to laypeople. The  
695 reception of this information by users will be reported in an upcoming publication.  
696 Future steps include the evaluation of the costs and effectiveness of the pre-emptive  
697 PGx passport in the general population and further research into the interplay  
698 between genetic variation and population health and drug response phenotypes.



## 699 **References**

- 700 1. Abdullah-Koolmees H, Keulen AM, Nijenhuis M, Deneer VHM.  
701 Pharmacogenetics Guidelines: Overview and Comparison of the DPWG, CPIC,  
702 CPNDS, and RNPGx Guidelines. *Front Pharmacol.* 2021 Jan 25;11:595219.
- 703 2. Lanting P, Drenth E, Boven L, Hoek A, Hijlkema A, Poot E, et al. Practical  
704 Barriers and Facilitators Experienced by Patients, Pharmacists and Physicians to  
705 the Implementation of Pharmacogenomic Screening in Dutch Outpatient Hospital  
706 Care-An Explorative Pilot Study. *J Pers Med.* 2020 Dec 21;10(4):293.
- 707 3. Duarte JD, Dalton R, Elchynski AL, Smith DM, Cicali EJ, Lee JC, et al. Multisite  
708 investigation of strategies for the clinical implementation of pre-emptive  
709 pharmacogenetic testing. *Genet Med.* 2021 Dec;23(12):2335–41.
- 710 4. Swen JJ, Wouden CH van der, Manson LE, Abdullah-Koolmees H, Blagec K,  
711 Blagus T, et al. A 12-gene pharmacogenetic panel to prevent adverse drug  
712 reactions: an open-label, multicentre, controlled, cluster-randomised crossover  
713 implementation study. *The Lancet.* 2023 Feb 4;401(10374):347–56.
- 714 5. Skokou M, Karamperis K, Koufaki MI, Tsermpini EE, Pandi MT, Siamoglou S, et  
715 al. Clinical implementation of preemptive pharmacogenomics in psychiatry.  
716 *eBioMedicine* [Internet]. 2024 Mar 1 [cited 2024 Aug 27];101. Available from:  
717 [https://www.thelancet.com/journals/ebiom/article/PIIS2352-3964\(24\)00044-](https://www.thelancet.com/journals/ebiom/article/PIIS2352-3964(24)00044-6/fulltext)  
718 [6/fulltext](https://www.thelancet.com/journals/ebiom/article/PIIS2352-3964(24)00044-6/fulltext)
- 719 6. Mason-Suares H, Kim W, Grimmatt L, Williams ES, Horner VL, Kunig D, et al.  
720 Density matters: comparison of array platforms for detection of copy-number

- 721 variation and copy-neutral abnormalities. *Genetics in Medicine*. 2013 Sep  
722 1;15(9):706–12.
- 723 7. Momtaz R, Ghanem N m., El-Makky N m., Ismail M a. Integrated analysis of  
724 SNP, CNV and gene expression data in genetic association studies. *Clinical*  
725 *Genetics*. 2018;93(3):557–66.
- 726 8. Taylor C, Crosby I, Yip V, Maguire P, Pirmohamed M, Turner RM. A Review of  
727 the Important Role of CYP2D6 in Pharmacogenomics. *Genes*. 2020  
728 Nov;11(11):1295.
- 729 9. Leitsalu L, Haller T, Esko T, Tammesoo ML, Alavere H, Snieder H, et al. Cohort  
730 Profile: Estonian Biobank of the Estonian Genome Center, University of Tartu.  
731 *International Journal of Epidemiology*. 2015 Aug 1;44(4):1137–47.
- 732 10. Sudlow C, Gallacher J, Allen N, Beral V, Burton P, Danesh J, et al. UK Biobank:  
733 An Open Access Resource for Identifying the Causes of a Wide Range of  
734 Complex Diseases of Middle and Old Age. *PLOS Medicine*. 2015  
735 mrt;12(3):e1001779.
- 736 11. Littlejohns TJ, Sudlow C, Allen NE, Collins R. UK Biobank: opportunities for  
737 cardiovascular research. *European Heart Journal*. 2019 Apr 7;40(14):1158–66.
- 738 12. Minegishi N, Nishijima I, Nobukuni T, Kudo H, Ishida N, Terakawa T, et al.  
739 Biobank Establishment and Sample Management in the Tohoku Medical  
740 Megabank Project. *The Tohoku Journal of Experimental Medicine*.  
741 2019;248(1):45–55.

- 742 13. Mahajan S, Lu Y, Spatz ES, Nasir K, Krumholz HM. Trends and Predictors of  
743 Use of Digital Health Technology in the United States. *Am J Med.* 2021  
744 Jan;134(1):129–34.
- 745 14. Shen N, Jankowicz D, Strudwick G. Patient and Family Engagement Approaches  
746 for Digital Health Initiatives: Protocol for a Case Study. *JMIR Research Protocols.*  
747 2021 Jul 21;10(7):e24274.
- 748 15. Integraal Zorg Akkoord. 2022 Sep;
- 749 16. Sijtsma A, Rienks J, Harst P, Navis G, Rosmalen JGM, Dotinga A. Cohort Profile  
750 Update: Lifelines, a three-generation cohort study and biobank. *Int J Epidemiol.*  
751 2022 Oct 13;51(5):e295–302.
- 752 17. Scholtens S, Smidt N, Swertz MA, Bakker SJ, Dotinga A, Vonk JM, et al. Cohort  
753 Profile: LifeLines, a three-generation cohort study and biobank. *International*  
754 *Journal of Epidemiology.* 2015 Aug 1;44(4):1172–80.
- 755 18. Warmink-Perdijk WDB, Peters LL, Tigchelaar EF, Dekens JAM, Jankipersadsing  
756 SA, Zhernakova A, et al. Lifelines NEXT: a prospective birth cohort adding the  
757 next generation to the three-generation Lifelines cohort study. *Eur J Epidemiol.*  
758 2020 Feb;35(2):157–68.
- 759 19. Warmerdam R, Lanting P, Lifelines Cohort Study, Deelen P, Franke L. Idéfix:  
760 identifying accidental sample mix-ups in biobanks using polygenic scores.  
761 *Bioinformatics.* 2022 Feb 15;38(4):1059–66.

- 762 20. Shah TS, Liu JZ, Floyd JAB, Morris JA, Wirth N, Barrett JC, et al. optiCall: a  
763 robust genotype-calling algorithm for rare, low-frequency and common variants.  
764 Bioinformatics. 2012 Jun 15;28(12):1598–603.
- 765 21. Franke L, el Bannoudi H, Jansen DTSL, Kok K, Trynka G, Diogo D, et al.  
766 Association analysis of copy numbers of FC-gamma receptor genes for  
767 rheumatoid arthritis and other immune-mediated phenotypes. European Journal  
768 of Human Genetics. 2016 Feb;24(2):263–70.
- 769 22. Pedregosa F, Varoquaux G, Gramfort A, Michel V, Thirion B, Grisel O, et al.  
770 Scikit-learn: Machine Learning in Python. Journal of Machine Learning Research.  
771 2011;12(85):2825–30.
- 772 23. Loh PR, Danecek P, Palamara PF, Fuchsberger C, A Reshef Y, K Finucane H, et  
773 al. Reference-based phasing using the Haplotype Reference Consortium panel.  
774 Nat Genet. 2016 Nov;48(11):1443–8.
- 775 24. statgen/Minimac4 [Internet]. Center for Statistical Genetics; 2024 [cited 2024 Aug  
776 27]. Available from: <https://github.com/statgen/Minimac4>
- 777 25. Byrska-Bishop M, Evani US, Zhao X, Basile AO, Abel HJ, Regier AA, et al. High-  
778 coverage whole-genome sequencing of the expanded 1000 Genomes Project  
779 cohort including 602 trios. Cell. 2022 Sep 1;185(18):3426-3440.e19.
- 780 26. Pratt VM, Del Tredici AL, Hachad H, Ji Y, Kalman LV, Scott SA, et al.  
781 Recommendations for Clinical CYP2C19 Genotyping Allele Selection. The  
782 Journal of Molecular Diagnostics. 2018 May;20(3):269–76.

- 783 27. Pratt VM, Cavallari LH, Del Tredici AL, Hachad H, Ji Y, Kalman LV, et al.  
784 Recommendations for Clinical Warfarin Genotyping Allele Selection. The Journal  
785 of Molecular Diagnostics. 2020 Jul;22(7):847–59.
- 786 28. Pratt VM, Cavallari LH, Del Tredici AL, Gaedigk A, Hachad H, Ji Y, et al.  
787 Recommendations for Clinical CYP2D6 Genotyping Allele Selection. The Journal  
788 of Molecular Diagnostics. 2021 Sep;23(9):1047–64.
- 789 29. Pratt VM, Cavallari LH, Fulmer ML, Gaedigk A, Hachad H, Ji Y, et al. *CYP3A4*  
790 and *CYP3A5* Genotyping Recommendations. The Journal of Molecular  
791 Diagnostics. 2023 Sep 1;25(9):619–29.
- 792 30. Hofmeister RJ, Ribeiro DM, Rubinacci S, Delaneau O. Accurate rare variant  
793 phasing of whole-genome and whole-exome sequencing data in the UK Biobank.  
794 Nat Genet. 2023 Jul;55(7):1243–9.
- 795 31. Kennedy S. Fluent in 3 Months. 2023 [cited 2024 Aug 28]. CEFR Levels: What  
796 They Are and How to Test Yourself. Available from:  
797 <https://www.fluentin3months.com/cefr-levels/>
- 798 32. Krist AH, Tong ST, Aycock RA, Longo DR. Engaging patients in decision-making  
799 and behavior change to promote prevention. Stud Health Technol Inform.  
800 2017;240:284–302.
- 801 33. Merker VL, Hyde JK, Herbst A, Solch AK, Mohr DC, Gaj L, et al. Evaluating the  
802 Impacts of Patient Engagement on Health Services Research Teams: Lessons  
803 from the Veteran Consulting Network. J Gen Intern Med. 2022 Apr;37(Suppl  
804 1):33–41.

- 805 34. Ministerie van Volksgezondheid, Welzijn en Sport. Stand van zaken inzet DNA-  
806 technologie voor zorg en preventie [Internet]. Ministerie van Algemene Zaken;  
807 2023 [cited 2024 Aug 27]. Available from:  
808 [https://www.rijksoverheid.nl/documenten/kamerstukken/2023/10/25/kamerbrief-](https://www.rijksoverheid.nl/documenten/kamerstukken/2023/10/25/kamerbrief-over-stand-van-zaken-inzet-dna-technologie-voor-zorg-en-preventie)  
809 [over-stand-van-zaken-inzet-dna-technologie-voor-zorg-en-preventie](https://www.rijksoverheid.nl/documenten/kamerstukken/2023/10/25/kamerbrief-over-stand-van-zaken-inzet-dna-technologie-voor-zorg-en-preventie)
- 810 35. Allison M, Patterson J, Burton S, Patel D, Brassil KJ. Digital engagement  
811 preferences of individuals aged 65 and older with cancer. JCO. 2020 Oct  
812 10;38(29\_suppl):289–289.
- 813 36. Borghouts J, Eikey E, Mark G, De Leon C, Schueller SM, Schneider M, et al.  
814 Barriers to and Facilitators of User Engagement With Digital Mental Health  
815 Interventions: Systematic Review. J Med Internet Res. 2021 Mar  
816 24;23(3):e24387.

817

## 818 **Acknowledgements**

819 The authors thank the UMCG Genomics Coordination Center, the UG Center for  
820 Information Technology and their sponsors BBMRI-NL & TarGet for storage and  
821 compute infrastructure. They thank Maaïke van der Lee and Jesse Swen from the  
822 department of Clinical Pharmacy and Toxicology of the Leiden University Medical  
823 Center for providing the validation samples with known genotypes. The authors  
824 thank Certe Groningen for their assistance in genotyping the CYP2D6 gene in a  
825 number of cases and the GIC of the KNMP for providing their drug information texts  
826 to generate layperson-friendly information. They also thank past and present  
827 members of the ELSI-team of the UMCG for valuable feedback on the developed  
828 communication materials.

829

830 Lifelines Cohort Study

831 The Lifelines Biobank initiative has been made possible by funding from the Dutch  
832 Ministry of Health, Welfare and Sport, the Dutch Ministry of Economic Affairs, the  
833 University Medical Center Groningen (UMCG the Netherlands), University of  
834 Groningen and the Northern Provinces of the Netherlands. The generation and  
835 management of GWAS genotype data for the Lifelines Cohort Study is supported by  
836 the UMCG Genetics Lifelines Initiative (UGLI). The authors wish to acknowledge the  
837 services of the Lifelines Cohort Study, the contributing research centers delivering  
838 data to Lifelines, and all the study participants.

839

840 Raul Aguirre-Gamboa (1), Patrick Deelen (1), Lude Franke (1), Jan A Kuivenhoven  
841 (2), Esteban A Lopera Maya (1), Ilja M Nolte (3), Serena Sanna (1), Harold Snieder  
842 (3), Morris A Swertz (1), Judith M Vonk (3), Cisca Wijmenga (1)

843

844 (1) Department of Genetics, University of Groningen, University Medical Center  
845 Groningen, The Netherlands

846

847 (2) Department of Pediatrics, University of Groningen, University Medical Center  
848 Groningen, The Netherlands

849

850 (3) Department of Epidemiology, University of Groningen, University Medical Center  
851 Groningen, The Netherlands

852

## 853 **Funding**

854 This work was supported by SNN (Samenwerkingsverband Noord Nederland)  
855 [OPSNN0229 PCH Ecosysteem WP4.4 ]; by Lifelines NEXT, which has been made  
856 possible by funds from a grant from the UMCG Hereditary Metabolic Diseases Fund;  
857 by the grants awarded to A.Z. (Netherlands Organization for Scientific Research  
858 [NWO] VIDI Grant [016.178.056], a European Research Council [ERC] starting grant  
859 [ERC-715772], and Gravitation program EXPOSOME-NL (NWO grant number  
860 024.004.017)), and the Lifelines Biobank initiative, which has been made possible by  
861 funds from FES (Fonds Economische Structuurversterking), SNN and REP  
862 (Ruimtelijk Economisch Programma).

863 L.F. is supported by grants from NWO [ZonMW-VIDI 917.14.374, ZonMW-VICI  
864 09150182010019], by an ERC Starting grant [637640 ImmRisk] and through a  
865 Senior Investigator grant from the OncoCode Institute. P.D. is funded by The  
866 Netherlands Organisation for Health Research and Development (ZonMw) [VENI  
867 09150161910057].

868

## 869 **Author contributions**

870 PL, BW, MS, NK, JD and LF: conceptualization,  
871 PL, RW, HB, TO, JS, MB, ELM, TOM, PD, JD and LF: methodology,  
872 RW, HB, BC, JS, LJ and LF: software,  
873 PL, RW, HB, TO, JS and MB: validation,  
874 PL, RW, HB, TO, JS, MB, ELM and SJ: formal analysis,  
875 SJ, JGA and DTe: investigation,  
876 LLN, LLCS, PD, NK, JD and LF: resources,  
877 PL, RW, HB, JS, ELM, SJ, BC and LJ: data curation,



878 PL, RW, HB, TO and JS: manuscript – original draft,

879 RW and JS: visualization,

880 BW, DTo, PD, NK, JD and LF: supervision,

881 PL, JS and JD: project administration,

882 NK, JD and LF: funding acquisition.

883

#### 884 **Data availability**

885 Due to privacy reasons the individual-level data cannot be made publicly available

886 but can be made available upon reasonable request. The individual-level data from

887 Lifelines that support the findings in this publication were obtained from the Lifelines

888 biobank under project application number ov21\_0355. This request should be

889 directed to the Lifelines Research Office through email ([research@lifelines.nl](mailto:research@lifelines.nl)) or by

890 using the application form on their website ([https://www.lifelines.nl/researcher/how-](https://www.lifelines.nl/researcher/how-to-apply/apply-here)

891 [to-apply/apply-here](https://www.lifelines.nl/researcher/how-to-apply/apply-here)). Access to the Lifelines NEXT Project data will be granted to all

892 qualified researchers and will be governed by the provisions laid out in the LLNEXT

893 Data Access Agreement: [https://groningenmicrobiome.org/?page\\_id=2598](https://groningenmicrobiome.org/?page_id=2598). This

894 access procedure is in place to ensure that the data is requested solely for research

895 and scientific purposes, in compliance with the informed consent signed by Lifelines

896 NEXT participants. Scripts and other software central to this manuscript is available

897 on GitHub (<https://github.com/molgenis/PGx-passport-pilot/> and

898 <https://github.com/molgenis/asterix>). Other analyses of genotype data and publicly

899 available reference data is performed using standard bioinformatics practices, for

900 which the code is made available upon request.

901

#### 902 **Conflicts of interest**

- 903 NdBV and DTo are members of the Dutch Pharmacogenetics Working Group  
904 (DPWG). All other authors report no conflict of interest.
